# Supplementary material for: Model evaluation of short-lived climate forcers for the Arctic Monitoring and Assessment Programme: a multi-species, multi-model study
Source: Copernicus journal article supplement (doi:10.5194/acp-2021-975), 2021-11-26
Supplement: Supplementary file 1 [file acp-2021-975-supplement.pdf]

Supplement of

## Model evaluation of short-lived climate forcers for the Arctic Monitoring and Assessment Programme: a multi-species, multi-model study

Whaley, C. H. et al

Correspondence to: Cynthia Whaley (cynthia.whaley@ec.gc.ca)

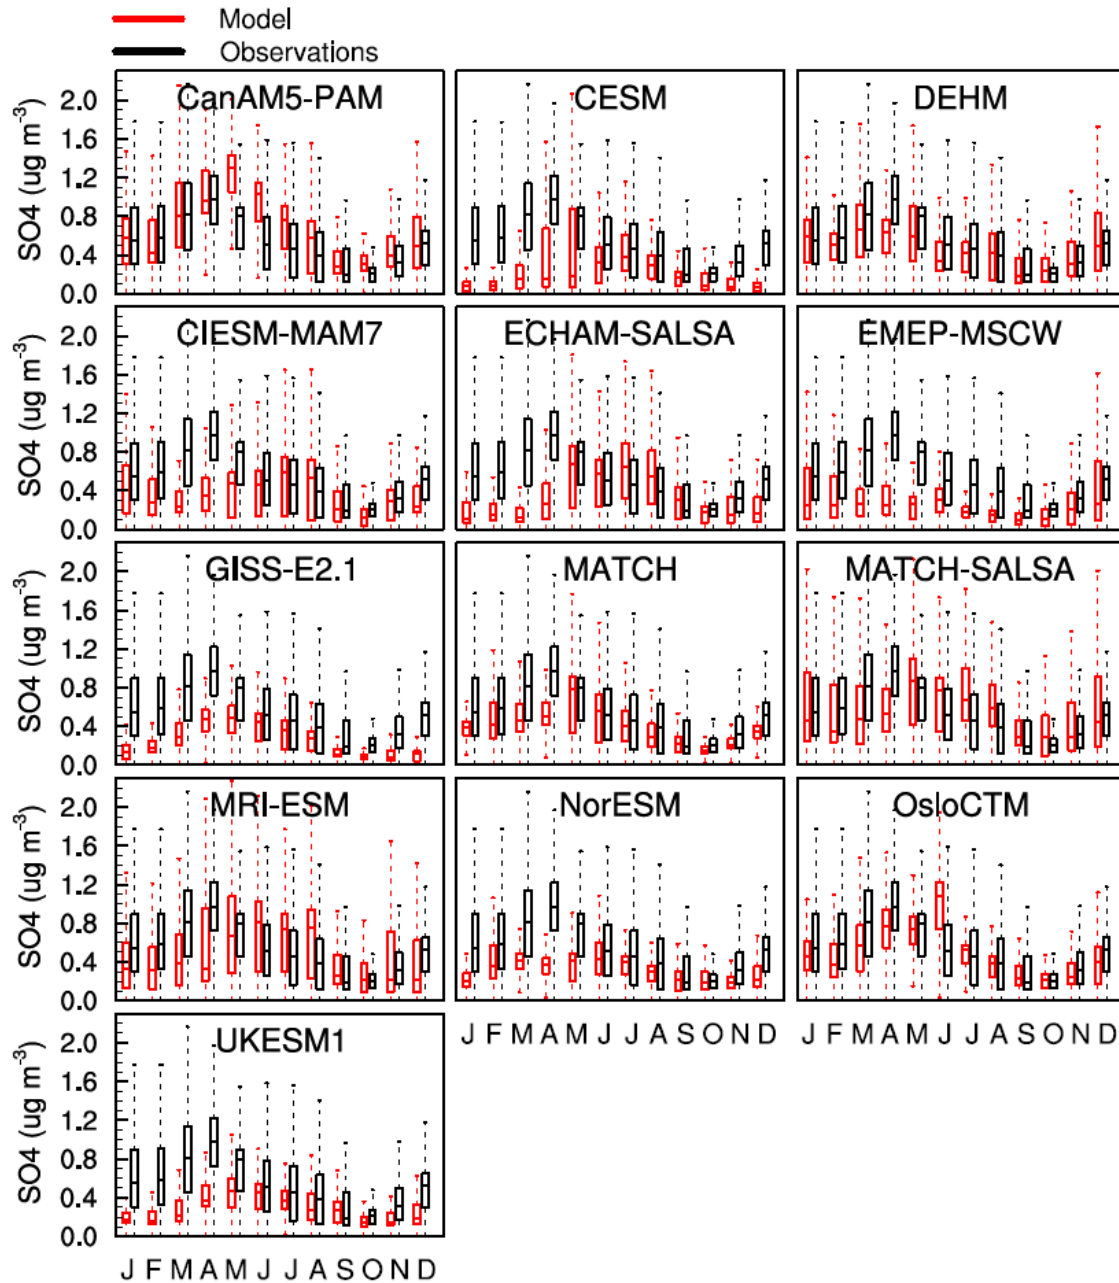

**Fig S1:** Measured (black) and modelled (red)  $\text{SO}_4^{2-}$  seasonal cycle, where box and whiskers represent the range from all Arctic sites grouped together for 2008-9.

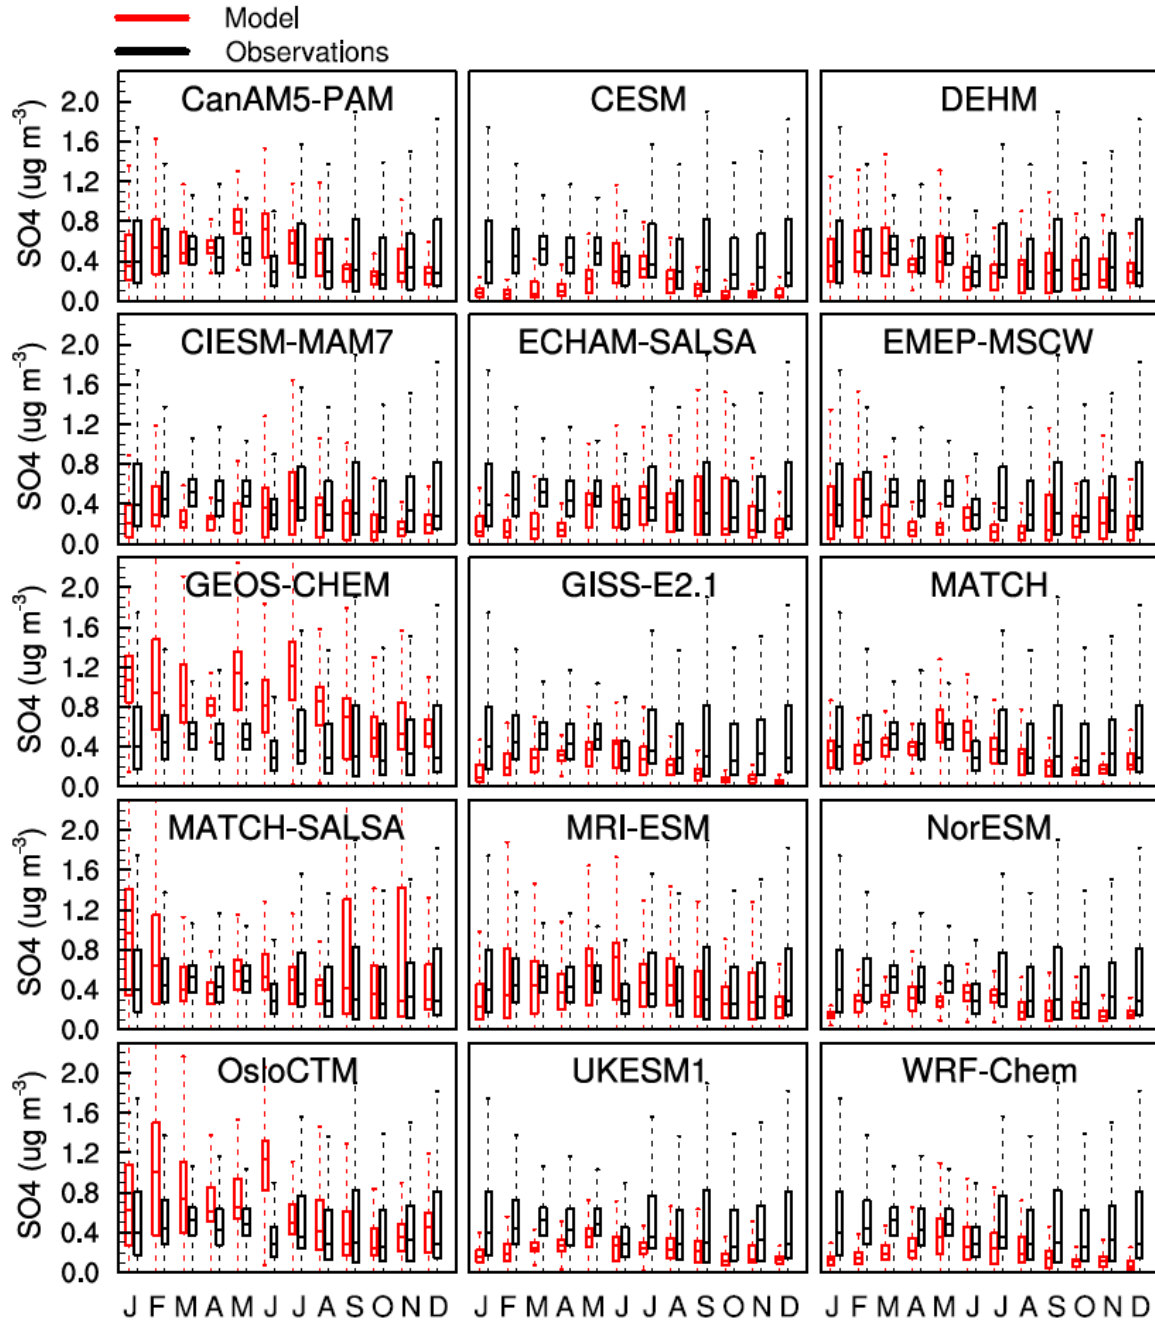

**Fig S2.** Measured (black) and modelled (red)  $\text{SO}_4^{2-}$  seasonal cycle, where box and whiskers represent the range from all Arctic sites grouped together for 2014-15.

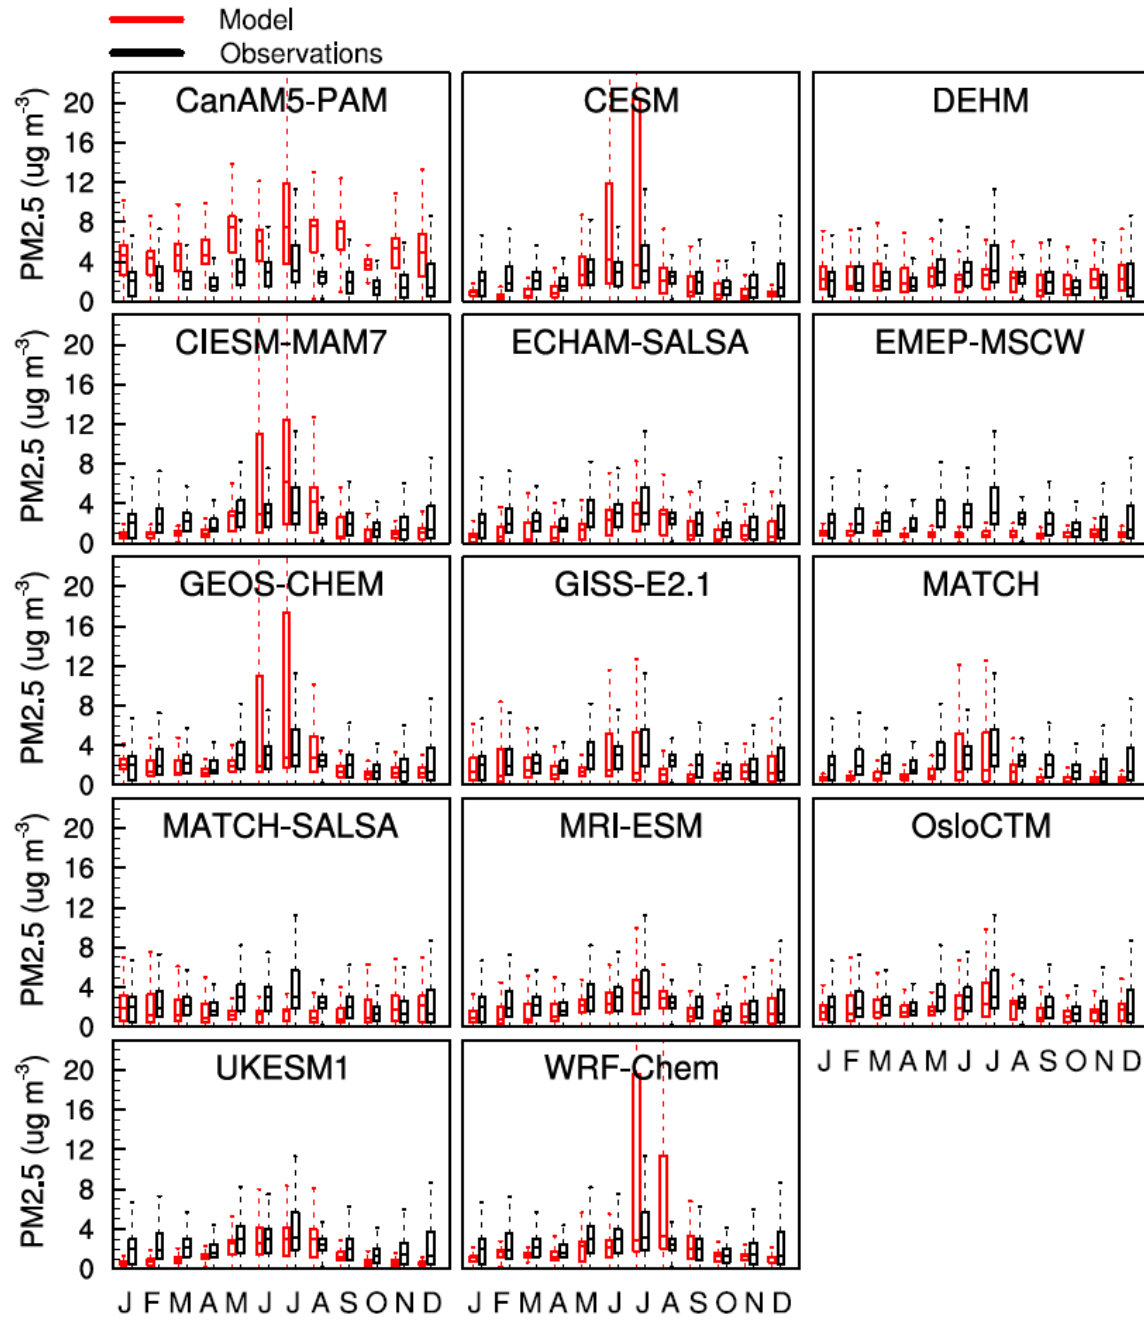

Fig S3. Modelled and measured monthly mean surface PM<sub>2.5</sub> concentrations in the Arctic for 2014-15.
